# Supplementary material
Source: PubMed Central journal article supplement (PMC7312224)
Supplement: wxz035_suppl_supplementary_material.pdf [file wxz035_suppl_supplementary_material.pdf]

## ONLINE SUPPLEMENTARY MATERIAL

---

### Hearing loss in agricultural workers exposed to pesticides and noise

Nattagorn Choochouy<sup>1</sup>, Pornpimol Kongtip<sup>1</sup>, Suttinun Chantanakul<sup>1</sup>,  
Noppanun Nankongnab<sup>1</sup>, Dusit Sujirarat<sup>2</sup>, Susan R. Woskie<sup>3</sup>

<sup>1</sup>Department of Occupational Health and Safety, Faculty of Public Health, Mahidol University, Bangkok, Thailand

<sup>2</sup>Department of Epidemiology, Faculty of Public Health, Mahidol University, Bangkok, Thailand

<sup>3</sup>Department of Public Health, University of Massachusetts Lowell, One University Ave, Lowell, MA 01854-2867 USA

*Corresponding author: Pornpimol Kongtip.*

*Department of Occupational Health and Safety, Faculty of Public Health, Mahidol University, Center of Excellence on Environmental Health and Toxicology (EHT), Ministry of Education, Thailand. 420/1 Rajvithi Rd, Rajthavee, Bangkok, 10400, Thailand.*

*Tel.: +66 (0) 2644 4069; fax: +66 (0) 2354 8561.*

*Email address: pornpimol.kon@mahidol.ac.th*

**Table S1. Multivariable linear regression model of the average hearing threshold (in units of dB HL) among full cohort of all farmers (n=335 subjects) for the low and high-frequency bands in the right and left ear.**

| Variables                                 | Low frequency (0.5-2 KHz) |       |         | High frequency (3-6 kHz) |       |         |
|-------------------------------------------|---------------------------|-------|---------|--------------------------|-------|---------|
|                                           | $\beta$                   | SE    | p-value | $\beta$                  | SE    | p-value |
| <b>Right ear</b>                          | AIC 2371.123              |       |         | AIC 2703.735             |       |         |
| <b>Intercept</b>                          | 11.406                    | 2.623 | <0.001* | 3.506                    | 4.308 | 0.416   |
| <b>Years using pesticides</b>             | 0.082                     | 0.047 | 0.076   | 0.223                    | 0.077 | 0.004*  |
| <b>Years using agricultural machinery</b> | -0.099                    | 0.056 | 0.076   | 0.201                    | 0.093 | 0.031*  |
| <b>Age (years)</b>                        | 0.185                     | 0.058 | 0.001*  | 0.345                    | 0.095 | <0.001* |
| <b>Industrial noise ever</b>              |                           |       |         |                          |       |         |
| Never                                     | 0.00                      | -     | -       | 0.00                     | -     | -       |
| Ever                                      | 0.633                     | 1.048 | 0.546   | 4.207                    | 1.722 | 0.015*  |
| <b>Cigarette smoking</b>                  |                           |       |         |                          |       |         |
| Never                                     | 0.00                      | -     | -       | 0.00                     | -     | -       |
| Former                                    | -0.223                    | 1.163 | 0.848   | 4.510                    | 1.911 | 0.018*  |
| Current                                   | 4.314                     | 1.915 | 0.024*  | 8.878                    | 3.147 | 0.005*  |
| <b>Left ear</b>                           | AIC 2452.380              |       |         | AIC 2715.032             |       |         |
| <b>Intercept</b>                          | 8.725                     | 2.961 | 0.003*  | -3.232                   | 4.382 | 0.461   |
| <b>Years using pesticides</b>             | 0.011                     | 0.053 | 0.836   | 0.223                    | 0.078 | 0.004*  |
| <b>Years using agricultural machinery</b> | -0.131                    | 0.063 | 0.138   | 0.261                    | 0.092 | 0.004*  |
| <b>Age (years)</b>                        | 0.334                     | 0.066 | <0.001* | 0.543                    | 0.097 | <0.001* |
| <b>Industrial noise ever</b>              |                           |       |         |                          |       |         |
| Never                                     | 0.00                      | -     | -       | 0.00                     | -     | -       |
| Ever                                      | -0.011                    | 1.183 | 0.992   | 2.862                    | 1.751 | 0.102   |
| <b>Cigarette smoking</b>                  |                           |       |         |                          |       |         |
| Never                                     | 0.00                      | -     | -       | 0.00                     | -     | -       |
| Former                                    | -0.568                    | 1.313 | 0.665   | 4.327                    | 1.943 | 0.026*  |

| Variables | Low frequency (0.5-2 KHz) |       |         | High frequency (3-6 kHz) |       |         |
|-----------|---------------------------|-------|---------|--------------------------|-------|---------|
|           | $\beta$                   | SE    | p-value | $\beta$                  | SE    | p-value |
| Current   | 2.757                     | 2.162 | 0.202   | 9.610                    | 3.200 | 0.003*  |

\*Significant at p-value 0.05

**Table S2. Multivariable linear regression model of the average hearing threshold (in units of dB HL) predicted by cumulative insecticide exposure (score-years) and cumulative noise exposure (dB(A)-years) among subcohort of conventional farmers (n=163 subjects) for the low and high-frequency bands in the right and left ear.**

| Variables                                            | Low frequency (0.5-2 KHz) |       |         | High frequency (3-6 kHz) |       |         |
|------------------------------------------------------|---------------------------|-------|---------|--------------------------|-------|---------|
|                                                      | $\beta$                   | SE    | p-value | $\beta$                  | SE    | p-value |
| <b>Right ear</b>                                     | AIC 1145.985              |       |         | AIC 1322.232             |       |         |
| <b>Intercept</b>                                     | 8.901                     | 3.977 | 0.025*  | -3.231                   | 6.829 | 0.636   |
| <b>Cumulative insecticide exposure (score-years)</b> |                           |       |         |                          |       |         |
| None                                                 | 0.00                      | -     | -       | 0.00                     | -     | -       |
| 0.07-0.945                                           | 1.888                     | 1.676 | 0.260   | 1.767                    | 2.877 | 0.125   |
| 0.946-2.407                                          | -0.051                    | 1.668 | 0.976   | 4.396                    | 2.865 | 0.125   |
| >2.407                                               | 0.575                     | 1.736 | 0.740   | 7.115                    | 2.981 | 0.015*  |
| <b>Cumulative noise exposure (dB(A)-years)</b>       |                           |       |         |                          |       |         |
| 0-72.4                                               | 0.00                      | -     | -       | 0.00                     | -     | -       |
| 72.4-88.9                                            | 0.256                     | 2.241 | 0.909   | 5.728                    | 3.808 | 0.133   |
| >88.9                                                | 3.124                     | 2.218 | 0.159   | 9.118                    | 3.849 | 0.018*  |
| <b>Age (years)</b>                                   | 0.209                     | 0.064 | 0.001*  | 0.490                    | 0.110 | <0.001* |
| <b>Industrial noise ever</b>                         |                           |       |         |                          |       |         |
| Never                                                | 0.00                      | -     | -       | 0.00                     | -     | -       |
| Ever                                                 | -0.547                    | 1.608 | 0.734   | 5.926                    | 2.760 | 0.032*  |
| <b>Cigarette smoking</b>                             |                           |       |         |                          |       |         |
| Never                                                | 0.00                      | -     | -       | 0.00                     | -     | -       |
| Former                                               | -0.507                    | 1.427 | 0.723   | 1.294                    | 2.450 | 0.597   |
| Current                                              | 12.031                    | 3.224 | <0.001* | 15.705                   | 5.536 | 0.005*  |
| <b>Left ear</b>                                      | AIC 1208.659              |       |         | AIC 1324.361             |       |         |
| <b>Intercept</b>                                     | 5.335                     | 4.820 | 0.268   | -13.743                  | 6.873 | 0.046*  |
| <b>Cumulative insecticide exposure (score-years)</b> |                           |       |         |                          |       |         |
| None                                                 | 0.00                      | -     | -       | 0.00                     | -     | -       |

| Variables                                      | Low frequency (0.5-2 KHz) |       |         | High frequency (3-6 kHz) |       |         |
|------------------------------------------------|---------------------------|-------|---------|--------------------------|-------|---------|
|                                                | $\beta$                   | SE    | p-value | $\beta$                  | SE    | p-value |
| 0.07-0.945                                     | 3.082                     | 2.031 | 0.129   | 4.001                    | 2.896 | 0.167   |
| 0.946-2.40                                     | 0.266                     | 2.022 | 0.895   | 1.544                    | 2.883 | 0.592   |
| >2.407                                         | 1.117                     | 2.104 | 0.595   | 7.091                    | 3.001 | 0.018*  |
| <b>Cumulative noise exposure (dB(A)-years)</b> |                           |       |         |                          |       |         |
| 0-72.4                                         | 0.00                      | -     | -       | 0.00                     | -     | -       |
| 72.4-88.9                                      | 1.500                     | 2.688 | 0.577   | 5.985                    | 3.833 | 0.118   |
| >88.9                                          | -1.473                    | 2.717 | 0.588   | 9.280                    | 3.874 | 0.017*  |
| <b>Age (years)</b>                             | 0.349                     | 0.078 | <0.001* | 0.709                    | 0.111 | <0.001* |
| <b>Industrial noise ever</b>                   |                           |       |         |                          |       |         |
| Never                                          | 0.00                      | -     | -       | 0.00                     | -     | -       |
| Ever                                           | -1.341                    | 1.948 | 0.491   | 4.386                    | 2.779 | 0.114   |
| <b>Cigarette smoking</b>                       |                           |       |         |                          |       |         |
| Never                                          | 0.00                      | -     | -       | 0.00                     | -     | -       |
| Former                                         | -2.153                    | 1.730 | 0.213   | 1.612                    | 2.466 | 0.513   |
| Current                                        | 6.471                     | 3.908 | 0.098   | 12.341                   | 5.572 | 0.027*  |

\*Significant at p-value 0.05

**Table S3. Multivariable linear regression model of the average hearing threshold (dB HL) predicted by cumulative organophosphate exposure (score-years) and cumulative noise exposure (dB(A)-years) among subcohort of conventional farmers (n=163 subjects) for the low and high-frequency bands in the right and left ear.**

| Variables                                                | Low frequency (0.5-2 KHz) |       |         | High frequency (3-6 kHz) |       |         |
|----------------------------------------------------------|---------------------------|-------|---------|--------------------------|-------|---------|
|                                                          | $\beta$                   | SE    | p-value | $\beta$                  | SE    | p-value |
| <b>Right ear</b>                                         | AIC 1142.503              |       |         | AIC 1311.738             |       |         |
| <b>Intercept</b>                                         | 9.533                     | 3.922 | 0.015*  | 0.756                    | 6.591 | 0.909   |
| <b>Cumulative Organophosphate exposure (score-years)</b> |                           |       |         |                          |       |         |
| None                                                     | 0.00                      | -     | -       | 0.00                     | -     | -       |
| 0.09-1.118                                               | 2.632                     | 1.591 | 0.138   | 3.450                    | 2.674 | 0.197   |
| >1.118                                                   | 2.223                     | 1.886 | 0.239   | 10.588                   | 3.170 | 0.001*  |
| <b>Cumulative noise exposure (dB(A)-years)</b>           |                           |       |         |                          |       |         |
| 0-72.4                                                   | 0.00                      | -     | -       | 0.00                     | -     | -       |
| 72.4-88.9                                                | 3.014                     | 2.194 | 0.169   | 5.420                    | 3.687 | 0.142   |
| >88.9                                                    | 0.023                     | 2.236 | 0.992   | 7.461                    | 3.757 | 0.047*  |
| <b>Age (years)</b>                                       | 0.195                     | 0.064 | 0.002*  | 0.432                    | 0.107 | <0.001* |
| <b>Industrial noise ever</b>                             |                           |       |         |                          |       |         |
| Never                                                    | 0.00                      | -     | -       | 0.00                     | -     | -       |
| Ever                                                     | -0.628                    | 1.591 | 0.693   | 5.292                    | 2.674 | 0.048*  |
| <b>Cigarette smoking</b>                                 |                           |       |         |                          |       |         |
| Never                                                    | 0.00                      | -     | -       | 0.00                     | -     | -       |
| Former                                                   | -0.462                    | 1.419 | 0.745   | 0.832                    | 2.385 | 0.727   |
| Current                                                  | 11.145                    | 3.181 | <0.001* | 12.704                   | 5.347 | 0.017*  |
| <b>Left ear</b>                                          | AIC 1208.076              |       |         | AIC 1318.043             |       |         |
| <b>Intercept</b>                                         | 5.609                     | 4.796 | 0.242   | -11.019                  | 6.719 | 0.101   |
| <b>Cumulative Organophosphate exposure (score-years)</b> |                           |       |         |                          |       |         |
| None                                                     | 0.00                      | -     | -       | 0.00                     | -     | -       |
| 0.09-1.118                                               | 1.979                     | 1.946 | 0.309   | 3.577                    | 2.726 | 0.189   |

| Variables                                      | Low frequency (0.5-2 KHz) |       |         | High frequency (3-6 kHz) |       |         |
|------------------------------------------------|---------------------------|-------|---------|--------------------------|-------|---------|
|                                                | $\beta$                   | SE    | p-value | $\beta$                  | SE    | p-value |
| >1.118                                         | -0.321                    | 2.307 | 0.889   | 10.330                   | 3.232 | 0.001*  |
| <b>Cumulative noise exposure (dB(A)-years)</b> |                           |       |         |                          |       |         |
| 0-72.4                                         | 0.00                      | -     | -       | 0.00                     | -     | -       |
| 72.4-88.9                                      | 1.815                     | 2.683 | 0.499   | 5.919                    | 3.759 | 0.115   |
| >88.9                                          | -0.819                    | 2.734 | 0.765   | 8.560                    | 3.830 | 0.025*  |
| <b>Age (years)</b>                             | 0.347                     | 0.078 | <0.001* | 0.678                    | 0.109 | <0.001* |
| <b>Industrial noise ever</b>                   |                           |       |         |                          |       |         |
| Never                                          | 0.00                      | -     | -       | 0.00                     | -     | -       |
| Ever                                           | -1.414                    | 1.946 | 0.467   | 4.465                    | 2.726 | 0.101   |
| <b>Cigarette smoking</b>                       |                           |       |         |                          |       |         |
| Never                                          | 0.00                      | -     | -       | 0.00                     | -     | -       |
| Former                                         | -1.910                    | 1.735 | 0.271   | 0.875                    | 2.431 | 0.719   |
| Current                                        | 6.885                     | 3.890 | 0.077   | 11.252                   | 5.451 | 0.039*  |

\*Significant at p-value 0.05
